# Supplementary material for: Changes in the Etiology of Acute Respiratory Infections among Children in Novosibirsk, Russia, between 2019 and 2022: The Impact of the SARS-CoV-2 Virus
Source: MDPI journal article supplement (doi:10.3390/v15040934), 2023-04-09
Supplement: s1 [file s1]

**Table S1.** Comparison of two virus groups.

| 2019–2020    | Comparison of two virus groups |                 | 2020–2021          | Comparison of two virus groups |                 | 2021–2022          | Comparison of two virus groups |                 |
|--------------|--------------------------------|-----------------|--------------------|--------------------------------|-----------------|--------------------|--------------------------------|-----------------|
|              | $\chi^2$                       | <i>P</i> -value |                    | $\chi^2$                       | <i>P</i> -value |                    | $\chi^2$                       | <i>P</i> -value |
| HIFV vs HRSV | 16.52                          | < 0.01          | HMPV vs HRV        | 46.38                          | < 0.01          | HRSV vs SARS-CoV-2 | 12.87                          | < 0.01          |
| HIFV vs HRV  | 162.21                         | < 0.01          | HMPV vs HCoV       | 76.8                           | < 0.01          | HRSV vs HIFV       | 32.38                          | < 0.01          |
| HIFV vs HPIV | 134.57                         | < 0.01          | HMPV vs HPIV       | 121.81                         | < 0.01          | HRSV vs HRV        | 36.53                          | < 0.01          |
| HIFV vs HCoV | 270.7                          | < 0.01          | HMPV vs HBoV       | 243.23                         | < 0.01          | HRSV vs HAdV       | 110.88                         | < 0.01          |
| HIFV vs HMPV | 311.63                         | < 0.01          | HMPV vs HAdV       | 342.37                         | < 0.01          | HRSV vs HPIV       | 112.73                         | < 0.01          |
| HIFV vs HBoV | 203.85                         | < 0.01          | HMPV vs SARS-CoV-2 | 356.2                          | < 0.01          | HRSV vs HCoV       | 167.56                         | < 0.01          |
| HIFV vs HAdV | 243.57                         | < 0.01          | HMPV vs HRSV       | 356.2                          | < 0.01          | HRSV vs HBoV       | 167.56                         | < 0.01          |

Abbreviations: HIFV - influenza A and B viruses; HRSV - respiratory syncytial virus; HRV - rhinovirus; HPIV - parainfluenza virus types 1–4; HCoV - alphacoronaviruses (NL63/229E) and betacoronaviruses (OC43/HKU1); HMPV - metapneumovirus; HBoV – bocavirus; HAdV – adenovirus; and SARS-CoV-2 - severe acute respiratory syndrome coronavirus 2.
